# Supplementary material for: Nitrogen limitation as a driver of genome size evolution in a group of karst plants
Source: PubMed Central journal article supplement (PMC4479984; doi:10.1038/srep11636), 2015-06-25

## Supporting information

Nitrogen limitation as a driver of genome size evolution in a group of karst plants

Ming Kang, Jing Wang, Hongwen Huang

Key Laboratory of Plant Resources Conservation and Sustainable Utilization, South China

Botanical Garden, Chinese Academy of Sciences, Guangzhou, China

**Table S1** Raw data of the 100 populations of *Primulina* in this study

| Species                                 | Genome size (pg) | C (mg g <sup>-1</sup> ) | N (mg g <sup>-1</sup> ) | P (mg g <sup>-1</sup> ) | C : N | N : P | C : P  |
|-----------------------------------------|------------------|-------------------------|-------------------------|-------------------------|-------|-------|--------|
| <i>P. baishouensis</i>                  | 1.78             | 358.31                  | 14.17                   | 0.94                    | 25.29 | 15.11 | 381.99 |
| <i>P. bicolor</i>                       | 2.12             | 367.36                  | 13.63                   | 1.76                    | 26.95 | 7.74  | 208.73 |
| <i>P. bipinnatifida</i>                 | 1.79             | 425.66                  | 11.84                   | 1.06                    | 35.95 | 11.17 | 401.57 |
| <i>P. brachytricha</i>                  | 1.73             | 381.19                  | 14.97                   | 1.88                    | 25.46 | 7.96  | 202.76 |
| <i>P. bullata</i>                       | 1.89             | 358.59                  | 10.33                   | 0.62                    | 34.71 | 16.66 | 578.37 |
| <i>P. cavicola</i>                      | 2.14             | 341.40                  | 13.11                   | 0.92                    | 26.04 | 14.25 | 371.09 |
| <i>P. chizhouensis</i>                  | 1.89             | 354.94                  | 17.20                   | 1.32                    | 20.64 | 13.03 | 268.89 |
| <i>P. cordifoli</i>                     | 2.05             | 352.79                  | 19.66                   | 1.07                    | 17.94 | 18.37 | 329.71 |
| <i>P. cordifolia</i>                    | 2.04             | 373.01                  | 16.33                   | 2.78                    | 22.84 | 5.87  | 134.18 |
| <i>P. danxiaensis</i>                   | 2.35             | 380.16                  | 31.74                   | 5.12                    | 11.98 | 6.20  | 74.28  |
| <i>P. depressa</i>                      | 2.07             | 360.69                  | 16.29                   | 3.07                    | 22.14 | 5.31  | 117.49 |
| <i>P. dongguanica</i>                   | 1.87             | 353.06                  | 16.54                   | 1.42                    | 21.35 | 11.65 | 248.63 |
| <i>P. eburnea.1</i>                     | 1.73             | 373.54                  | 18.31                   | 1.13                    | 20.40 | 16.20 | 330.57 |
| <i>P. eburnea.2</i>                     | 2.03             | 331.11                  | 13.34                   | 3.49                    | 24.82 | 3.82  | 94.87  |
| <i>P. fimbrisepala</i>                  | 2.15             | 404.14                  | 18.34                   | 1.69                    | 22.04 | 10.85 | 239.14 |
| <i>P. glandulosa</i>                    | 2.14             | 362.96                  | 20.77                   | 1.07                    | 17.48 | 19.41 | 339.21 |
| <i>P. gueilinensis</i>                  | 1.96             | 366.68                  | 13.92                   | 1.41                    | 26.34 | 9.87  | 260.06 |
| <i>P. gueilinensis var. brachycarpa</i> | 2.54             | 325.44                  | 27.62                   | 2.32                    | 11.78 | 11.91 | 140.34 |
| <i>P. guihaiensis</i>                   | 2.05             | 346.79                  | 17.55                   | 2.09                    | 19.76 | 8.41  | 166.25 |
| <i>P. hedyotideae</i>                   | 1.56             | 342.23                  | 6.51                    | 1.05                    | 52.57 | 6.22  | 326.87 |
| <i>P. heterotricha</i>                  | 1.39             | 352.54                  | 14.98                   | 2.49                    | 23.53 | 6.02  | 141.58 |
| <i>P. hochiensis</i>                    | 1.77             | 363.80                  | 17.02                   | 1.86                    | 21.37 | 9.15  | 195.59 |
| <i>P. huaijiensis</i>                   | 1.12             | 359.24                  | 5.38                    | 1.01                    | 66.77 | 5.32  | 355.33 |
| <i>P. juliae</i>                        | 2.51             | 352.60                  | 26.97                   | 1.31                    | 13.07 | 20.64 | 269.78 |
| <i>P. langshanica</i>                   | 1.80             | 341.06                  | 12.51                   | 1.87                    | 27.26 | 6.69  | 182.39 |
| <i>P. latinervis</i>                    | 2.28             | 355.38                  | 17.36                   | 2.11                    | 20.47 | 8.23  | 168.43 |
| <i>P. laxiflora</i>                     | 1.36             | 373.85                  | 10.38                   | 0.86                    | 36.02 | 12.07 | 434.71 |
| <i>P. leiophylla</i>                    | 1.92             | 332.41                  | 9.38                    | 0.55                    | 35.44 | 17.05 | 604.38 |

|                                                   |      |        |       |      |       |       |        |
|---------------------------------------------------|------|--------|-------|------|-------|-------|--------|
| <i>P. lepingensis</i>                             | 2.23 | 342.52 | 22.23 | 3.45 | 15.41 | 6.44  | 99.28  |
| <i>P. leprosa</i>                                 | 2.07 | 345.48 | 8.66  | 0.74 | 39.89 | 11.70 | 466.86 |
| <i>P. liboensis</i>                               | 1.98 | 355.55 | 7.43  | 0.46 | 47.85 | 16.15 | 772.93 |
| <i>P. liguliformis</i>                            | 1.68 | 338.47 | 11.44 | 1.21 | 29.59 | 9.45  | 279.73 |
| <i>P. lijiangensis</i>                            | 2.17 | 370.61 | 10.46 | 1.75 | 35.43 | 5.99  | 212.26 |
| <i>P. linearicalyx</i>                            | 1.49 | 358.38 | 10.93 | 0.93 | 32.79 | 11.75 | 385.35 |
| <i>P. linearifolia</i>                            | 1.18 | 357.57 | 9.25  | 1.24 | 38.66 | 7.46  | 288.36 |
| <i>P. lobulata</i>                                | 1.94 | 377.48 | 13.70 | 0.78 | 27.55 | 17.56 | 483.95 |
| <i>P. longgangensis</i>                           | 1.39 | 366.70 | 8.86  | 0.50 | 41.39 | 17.72 | 733.40 |
| <i>P. longicalyx</i>                              | 2.06 | 354.74 | 14.81 | 1.24 | 23.95 | 11.94 | 286.08 |
| <i>P. longii</i>                                  | 2.06 | 363.95 | 10.45 | 0.88 | 34.83 | 11.88 | 413.58 |
| <i>P. longistyla</i>                              | 2.16 | 393.04 | 20.18 | 1.18 | 19.48 | 17.12 | 333.37 |
| <i>P. lunglinensis</i>                            | 2.12 | 347.85 | 15.56 | 2.24 | 22.36 | 6.94  | 155.08 |
| <i>P. lungzhouensis</i>                           | 2.07 | 374.33 | 10.46 | 1.28 | 35.79 | 8.17  | 292.45 |
| <i>P. luochengensis</i>                           | 1.32 | 339.68 | 10.13 | 0.50 | 33.53 | 20.10 | 673.97 |
| <i>P. lutea</i>                                   | 2.26 | 369.32 | 13.39 | 1.47 | 27.58 | 9.11  | 251.24 |
| <i>P. mabaensis</i>                               | 2.30 | 337.28 | 20.55 | 1.64 | 16.41 | 12.53 | 205.66 |
| <i>P. macrodonta</i>                              | 1.80 | 367.47 | 17.90 | 2.15 | 20.53 | 8.33  | 170.92 |
| <i>P. medica</i>                                  | 2.03 | 358.41 | 12.01 | 0.74 | 29.84 | 16.34 | 487.63 |
| <i>P. moii</i>                                    | 2.03 | 380.71 | 17.40 | 2.03 | 21.88 | 8.57  | 187.54 |
| <i>P. mollifolia</i>                              | 2.17 | 359.91 | 9.78  | 0.68 | 36.80 | 14.45 | 531.62 |
| <i>P. nandanensis</i>                             | 1.94 | 353.98 | 16.83 | 1.76 | 21.03 | 9.56  | 201.13 |
| <i>P. napoensis</i>                               | 1.90 | 348.85 | 11.28 | 0.98 | 30.93 | 11.51 | 355.97 |
| <i>P. obtusidentata</i>                           | 2.28 | 394.19 | 20.91 | 1.77 | 18.85 | 11.81 | 222.71 |
| <i>P. ophiopogoides</i>                           | 1.38 | 386.08 | 7.42  | 1.01 | 52.03 | 7.35  | 382.26 |
| <i>P. orthandra</i>                               | 1.84 | 349.05 | 8.09  | 1.06 | 43.15 | 7.63  | 329.29 |
| <i>P. parvifolia</i>                              | 1.47 | 360.68 | 12.80 | 0.77 | 28.18 | 16.62 | 468.42 |
| <i>P. pinnatifida</i>                             | 2.28 | 385.81 | 17.74 | 1.12 | 21.75 | 15.84 | 344.47 |
| <i>P. pseudoeburnea</i>                           | 1.72 | 350.99 | 11.97 | 1.61 | 29.32 | 7.43  | 218.01 |
| <i>P. pterippoda</i>                              | 1.46 | 322.96 | 15.04 | 2.03 | 21.47 | 7.41  | 159.09 |
| <i>P. pulchurifolia</i>                           | 1.86 | 348.09 | 9.04  | 1.64 | 38.51 | 5.50  | 211.86 |
| <i>P. qingyuanensis</i>                           | 1.97 | 350.19 | 12.14 | 1.10 | 28.85 | 11.00 | 317.20 |
| <i>P. renifolia</i>                               | 1.66 | 342.35 | 13.05 | 1.05 | 26.23 | 12.43 | 326.05 |
| <i>P. repanda</i>                                 | 2.09 | 388.78 | 21.54 | 1.50 | 18.05 | 14.36 | 259.19 |
| <i>P. repanda</i> var.<br><i>guilinensis</i>      | 1.95 | 353.34 | 13.35 | 1.63 | 26.47 | 8.19  | 216.77 |
| <i>P. ronganensis</i>                             | 1.94 | 334.57 | 14.44 | 1.18 | 23.17 | 12.24 | 283.53 |
| <i>P. rongshuiensis</i>                           | 1.96 | 341.92 | 10.97 | 1.14 | 31.17 | 9.62  | 299.93 |
| <i>P. roseo-alba</i>                              | 2.03 | 361.10 | 14.39 | 1.42 | 25.09 | 10.13 | 254.30 |
| <i>P. sclerophylla</i>                            | 1.74 | 335.03 | 18.64 | 1.27 | 17.97 | 14.68 | 263.80 |
| <i>P. shouchengensis</i>                          | 2.07 | 362.10 | 12.46 | 1.86 | 29.06 | 6.70  | 194.68 |
| <i>P. sinensis</i>                                | 2.35 | 367.16 | 23.80 | 1.56 | 15.43 | 15.29 | 235.81 |
| <i>P. spinulosa</i>                               | 1.47 | 365.64 | 9.39  | 0.78 | 38.94 | 12.04 | 468.77 |
| <i>P. subrhomboidea</i>                           | 1.87 | 358.38 | 20.89 | 2.29 | 17.16 | 9.12  | 156.50 |
| <i>P. subrhomboidea</i><br>var. <i>tribractea</i> | 1.97 | 365.74 | 6.99  | 1.21 | 52.32 | 5.78  | 302.26 |

|                         |      |        |       |      |       |       |        |
|-------------------------|------|--------|-------|------|-------|-------|--------|
| <i>P. subulata</i>      | 1.80 | 346.85 | 11.45 | 0.94 | 30.29 | 12.18 | 368.99 |
| <i>P. swinglei</i>      | 1.62 | 325.22 | 15.34 | 1.28 | 21.20 | 11.98 | 254.08 |
| <i>P. tabacum</i>       | 1.81 | 366.38 | 16.51 | 1.71 | 22.19 | 9.65  | 214.26 |
| <i>P. tenuifolia</i>    | 2.10 | 331.91 | 18.94 | 1.77 | 17.52 | 10.70 | 187.52 |
| <i>P. tenuituba</i>     | 2.15 | 381.30 | 12.47 | 1.50 | 30.58 | 8.30  | 253.69 |
| <i>P. tiandengensis</i> | 1.71 | 353.70 | 12.94 | 1.12 | 27.33 | 11.55 | 315.80 |
| <i>P. tribracteata</i>  | 2.13 | 367.39 | 14.20 | 0.66 | 25.87 | 21.48 | 555.81 |
| <i>P. varicolor</i>     | 2.01 | 358.84 | 8.04  | 0.96 | 44.63 | 8.38  | 373.79 |
| <i>P. verecunda</i>     | 1.79 | 400.37 | 16.66 | 1.10 | 24.03 | 15.15 | 363.97 |
| <i>P. villosissima</i>  | 2.04 | 338.85 | 11.26 | 1.33 | 30.09 | 8.47  | 254.77 |
| <i>P. wentsaii</i>      | 1.63 | 350.79 | 9.05  | 0.84 | 38.76 | 10.77 | 417.61 |
| <i>P. xiuningensis</i>  | 2.39 | 334.77 | 38.38 | 4.32 | 8.72  | 8.88  | 77.49  |
| <i>P. xiziae</i>        | 1.87 | 350.24 | 18.73 | 1.20 | 18.70 | 15.57 | 291.14 |
| <i>P. yangchunensis</i> | 1.71 | 375.54 | 6.72  | 0.83 | 55.88 | 8.11  | 453.00 |
| <i>P. yongxingensis</i> | 2.53 | 350.82 | 31.96 | 0.78 | 10.98 | 41.24 | 452.67 |
| <i>P. yungfuensis</i>   | 2.06 | 344.89 | 14.19 | 0.65 | 24.31 | 21.76 | 528.97 |
| <i>P. sp.nov.1</i>      | 1.85 | 356.29 | 10.34 | 2.41 | 34.46 | 4.29  | 147.84 |
| <i>P. sp.nov.2</i>      | 1.88 | 315.43 | 8.36  | 0.53 | 37.73 | 15.77 | 595.15 |
| <i>P. sp.nov.3</i>      | 2.04 | 355.62 | 20.75 | 2.36 | 17.14 | 8.79  | 150.69 |
| <i>P. sp.nov.4</i>      | 1.89 | 363.84 | 14.99 | 1.22 | 24.27 | 12.29 | 298.23 |
| <i>P. sp.nov.5</i>      | 1.29 | 355.04 | 6.02  | 0.66 | 58.98 | 9.12  | 537.94 |
| <i>P. sp.nov.6</i>      | 2.00 | 362.70 | 13.24 | 0.95 | 27.39 | 13.94 | 381.79 |
| <i>P. sp.nov.7</i>      | 1.86 | 354.47 | 9.00  | 1.27 | 39.39 | 7.09  | 279.11 |
| <i>P. sp.nov.8</i>      | 1.88 | 386.30 | 20.25 | 1.65 | 19.08 | 12.27 | 234.12 |
| <i>P. sp.nov.9</i>      | 2.19 | 339.17 | 17.79 | 2.05 | 19.07 | 8.68  | 165.45 |
| <i>P. sp.nov.10</i>     | 2.17 | 351.01 | 15.06 | 1.27 | 23.31 | 11.86 | 276.39 |
| <i>P. sp.nov.11</i>     | 2.30 | 338.11 | 20.12 | 1.63 | 16.80 | 12.34 | 207.43 |
| <i>P. sp.nov.12</i>     | 1.72 | 363.80 | 7.02  | 0.86 | 51.82 | 8.16  | 423.02 |

**Table S2** Summary of genome size (2C DNA content) in relation to leaf nutrient contents under regression models of ordinary least squares (OLS) and phylogenetic generalized least squares (PGLS). The values of log-likelihood (Lh), slope,  $R^2$  and  $P$  are indicated. Statistically significant relationships are in bold ( $P<0.05$ )

|                         | PGLS   |        |              |                            | OLS     |        |              |                              |
|-------------------------|--------|--------|--------------|----------------------------|---------|--------|--------------|------------------------------|
|                         | Lh     | Slope  | $R^2$        | $P$                        | Lh      | Slope  | $R^2$        | $P$                          |
| C (mg g <sup>-1</sup> ) | 12.992 | -0.104 | 0.002        | 0.790                      | -14.659 | 0.170  | 0.003        | 0.734                        |
| N (mg g <sup>-1</sup> ) | 18.784 | 0.111  | <b>0.120</b> | <b>7.7×10<sup>-6</sup></b> | 4.707   | 0.233  | <b>0.299</b> | <b>7.84×10<sup>-14</sup></b> |
| P (mg g <sup>-1</sup> ) | 14.147 | 0.034  | 0.020        | 0.135                      | -6.269  | 0.104  | <b>0.096</b> | <b>7.75×10<sup>-5</sup></b>  |
| C: N                    | 17.125 | -0.115 | <b>0.098</b> | <b>6.7×10<sup>-5</sup></b> | 1.733   | -0.229 | <b>0.290</b> | <b>2.03×10<sup>-13</sup></b> |
| C: P                    | 14.723 | -0.035 | 0.022        | 0.144                      | -6.324  | -0.102 | <b>0.092</b> | <b>0.0001</b>                |
| N: P                    | 13.017 | 0.009  | 0.002        | 0.857                      | -14.587 | 0.057  | 0.020        | 0.137                        |

**Table S3** Summary of leaf N concentration in relation to latitude and bioclimatic variables under the regression model of phylogenetic generalized least squares (PGLS)

|                                                                    | Slope  | $R^2$        | $P$                         |
|--------------------------------------------------------------------|--------|--------------|-----------------------------|
| Latitude (°N)                                                      | 2.14   | <b>0.171</b> | <b>4.67×10<sup>-8</sup></b> |
| BIO 1 = Annual mean temperature                                    | -1.021 | <b>0.096</b> | <b>8.28×10<sup>-5</sup></b> |
| BIO 2 = Mean diurnal range (mean of monthly (max temp - min temp)) | -0.317 | 0.004        | 0.704                       |
| BIO 3 = Isothermality (BIO2/BIO7) (*100)                           | -1.16  | <b>0.135</b> | <b>1.6×10<sup>-6</sup></b>  |
| BIO 4 = Temperature seasonality (standard deviation *100)          | 0.828  | <b>0.122</b> | <b>5.9×10<sup>-6</sup></b>  |
| BIO 5 = Max temperature of warmest month                           | 0.21   | 0.001        | 0.907                       |
| BIO 6 = Min temperature of coldest month                           | -0.256 | <b>0.141</b> | <b>1.4×10<sup>-6</sup></b>  |
| BIO 7 = Temperature annual range (BIO5-BIO6)                       | 1.217  | <b>0.128</b> | <b>3.6×10<sup>-6</sup></b>  |
| BIO 8 = Mean temperature of wettest quarter                        | -1.21  | <b>0.08</b>  | <b>0.0003</b>               |
| BIO 9 = Mean temperature of driest quarter                         | -0.35  | <b>0.092</b> | <b>0.0001</b>               |
| BIO 10 = Mean temperature of warmest quarter                       | -0.348 | 0.003        | 0.718                       |
| BIO 11 = Mean temperature of coldest quarter                       | -0.424 | <b>0.131</b> | <b>2.6×10<sup>-6</sup></b>  |
| BIO 12 = Annual precipitation                                      | 0.001  | 0.0001       | 1                           |
| BIO 13 = Precipitation of wettest month                            | -0.291 | 0.019        | 0.154                       |
| BIO 14 = Precipitation of driest month                             | 0.259  | <b>0.056</b> | <b>0.004</b>                |
| BIO 15 = Precipitation seasonality (coefficient of variation)      | -0.021 | <b>0.133</b> | <b>2.1×10<sup>-6</sup></b>  |
| BIO 16 = Precipitation of wettest quarter                          | -0.353 | 0.024        | 0.094                       |
| BIO 17 = Precipitation of driest quarter                           | 0.0275 | <b>0.053</b> | <b>0.006</b>                |
| BIO 18 = Precipitation of warmest quarter                          | -0.554 | <b>0.078</b> | <b>0.0005</b>               |
| BIO 19 = Precipitation of coldest quarter                          | 0.188  | <b>0.037</b> | <b>0.026</b>                |

**Fig. S1** Sampling locations of the 100 populations representing 99 species of *Primulina* in south China. The map was made with Natural Earth (Free vector and raster map data @ [naturalearthdata.com](http://naturalearthdata.com)).

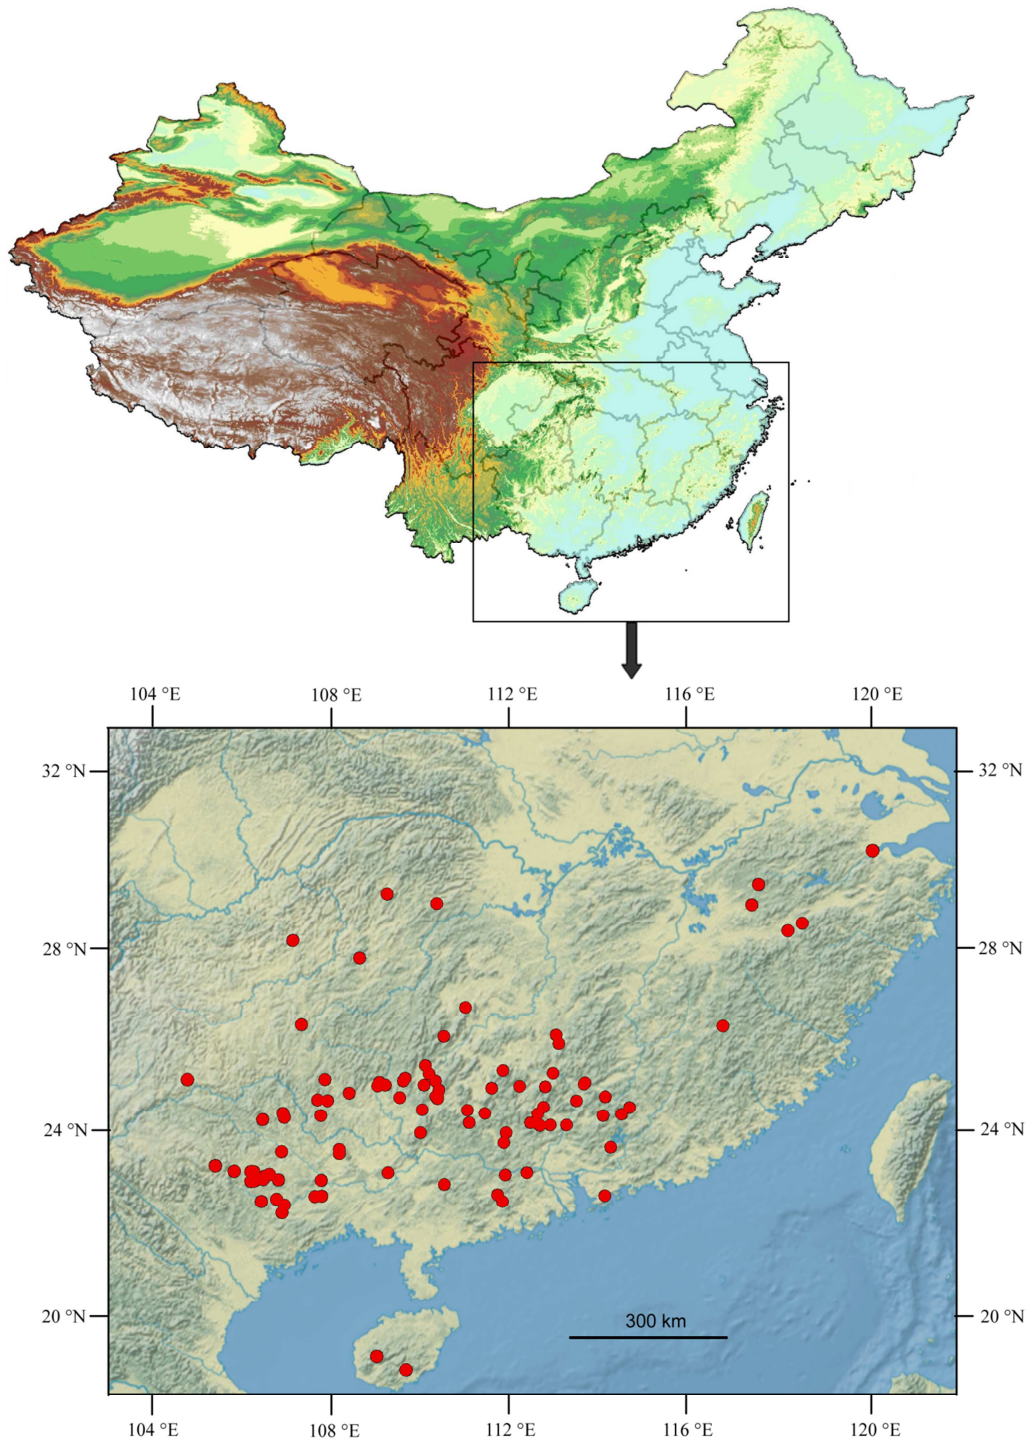

Supplement: srep11636-s1.pdf [file srep11636-s1.pdf]
